# Supplementary material for: Taxonomic Revision of the pulcherrima Clade of Metschnikowia (Fungi): Merger of Species
Source: MDPI journal article supplement (doi:10.3390/taxonomy2010009), 2022-03-01
Supplement: s1 [file s1]

**Table S2.** Accession numbers of rDNA (primary) barcode sequences.

| Strain                                                 | rDNA segment | Type of sequence | Accession number |
|--------------------------------------------------------|--------------|------------------|------------------|
| <i>M. andauensis</i> 11-1120 (CBS 10809 <sup>T</sup> ) |              |                  |                  |
|                                                        | D1/D2        | amplicon         | MZ655969*        |
|                                                        |              | cloned           | KC411953         |
|                                                        |              | cloned           | KC411954         |
|                                                        |              | cloned           | KC411955         |
|                                                        |              | cloned           | KC411956         |
|                                                        |              | cloned           | KC411957         |
|                                                        |              | cloned           | KC411958         |
|                                                        |              | cloned           | KC411959         |
|                                                        | ITS          | cloned           | KM243743         |
|                                                        |              | cloned           | KM243744         |
|                                                        |              | cloned           | KM243745         |
|                                                        |              | cloned           | KM243746         |
|                                                        |              | cloned           | KM243747         |
|                                                        |              | cloned           | KM243748         |
| <i>M. citriensis</i> FL01 <sup>T</sup>                 |              |                  |                  |
|                                                        | D1/D2        | amplicon         | MF538699         |
|                                                        | ITS          | amplicon         | MF538700         |
| <i>M. fructicola</i> 11-579 (CBS 8853 <sup>T</sup> )   |              |                  |                  |
|                                                        | D1/D2        | amplicon         | MZ650921*        |
|                                                        |              | cloned           | KC411962         |
|                                                        |              | cloned           | KC411963         |
|                                                        |              | cloned           | KC411964         |
|                                                        |              | cloned           | KC411965         |
|                                                        |              | cloned           | KC411966         |
|                                                        |              | cloned           | KC411967         |
|                                                        |              | cloned           | KC411968         |
|                                                        |              | cloned           | KC411969         |
|                                                        |              | cloned           | KC411970         |
|                                                        |              | cloned           | KC411960         |
|                                                        |              | cloned           | KC411961         |
|                                                        | ITS          | cloned           | KM213977         |
|                                                        |              | cloned           | KM213978         |
|                                                        |              | cloned           | KM213979         |
|                                                        |              | cloned           | KM213980         |
|                                                        |              | cloned           | KM213981         |
|                                                        |              | cloned           | KM213982         |
|                                                        |              | cloned           | KM213983         |
|                                                        |              | cloned           | KM213984         |
| <i>M. leonuri</i> CBS 15341 <sup>T</sup>               |              |                  |                  |
|                                                        | D1/D2        | amplicon         | MG050900         |
|                                                        | ITS          | amplicon         | NR_158857        |
| <i>M. persimmonesis</i> KCTC 12991BP <sup>T</sup>      |              |                  |                  |
|                                                        | D1/D2        | amplicon         | MF4466189        |
|                                                        | ITS          | amplicon         | MF446617         |
| <i>M. pulcherrima</i> 11-578 (CBS 5833 <sup>T</sup> )  |              |                  |                  |
|                                                        | D1/D2        | amplicon         | MZ650483*        |

|                                                       |          |           |
|-------------------------------------------------------|----------|-----------|
|                                                       | cloned   | KM249361  |
|                                                       | cloned   | KM249362  |
|                                                       | cloned   | KM249363  |
|                                                       | cloned   | KM249364  |
|                                                       | cloned   | KM249365  |
|                                                       | cloned   | KM249366  |
|                                                       | cloned   | KM249367  |
|                                                       | cloned   | KM249368  |
|                                                       | cloned   | KM249369  |
|                                                       | cloned   | KM249370  |
|                                                       | cloned   | KM249371  |
|                                                       | cloned   | KM249372  |
|                                                       | cloned   | KM249373  |
|                                                       | cloned   | KM249374  |
| <hr/>                                                 |          |           |
| ITS                                                   | amplicon | NR_164379 |
|                                                       | amplicon | JX188180  |
|                                                       | amplicon | JX188179  |
|                                                       | amplicon | MK394155  |
|                                                       | amplicon | KY104205  |
|                                                       | cloned   | KM209321  |
|                                                       | cloned   | KM209322  |
|                                                       | cloned   | KM209323  |
|                                                       | cloned   | KM209324  |
|                                                       | cloned   | KM209325  |
|                                                       | cloned   | KM209326  |
|                                                       | cloned   | KM209327  |
|                                                       |          |           |
| <hr/>                                                 |          |           |
| <i>M. rubicola</i> CBS 15344 <sup>T</sup>             |          |           |
| <hr/>                                                 |          |           |
| D1/D2                                                 | amplicon | MG050901  |
| <hr/>                                                 |          |           |
| ITS                                                   | amplicon | MG050888  |
| <hr/>                                                 |          |           |
| <i>M. shanxiensis</i> 11-1090 (CBS 10359 <sup>T</sup> |          |           |
| <hr/>                                                 |          |           |
| D1/D2                                                 | amplicon | MZ655911* |
|                                                       | cloned   | KM350705  |
|                                                       | cloned   | KM350706  |
|                                                       | cloned   | KM350707  |
|                                                       | cloned   | KM350708  |
|                                                       | cloned   | KM350709  |
|                                                       | cloned   | KM350710  |
|                                                       | cloned   | KM350711  |
|                                                       | cloned   | KM350712  |
|                                                       | cloned   | KM350713  |
| <hr/>                                                 |          |           |
| ITS                                                   | amplicon | KY104210  |
|                                                       | amplicon | DQ367883  |
|                                                       | amplicon | NR_155403 |
|                                                       | amplicon | MW543708  |
|                                                       | cloned   | KM243731  |
|                                                       | cloned   | KM243732  |
|                                                       | cloned   | KM243733  |
|                                                       | cloned   | KM243734  |
|                                                       | cloned   | KM243735  |
|                                                       | cloned   | KM243736  |
|                                                       | cloned   | KM243737  |

|                                                                     |          |           |
|---------------------------------------------------------------------|----------|-----------|
|                                                                     | cloned   | KM243738  |
|                                                                     | cloned   | KM243739  |
|                                                                     | cloned   | KM243740  |
|                                                                     | cloned   | KM243741  |
|                                                                     | cloned   | KM243742  |
| <hr/> <i>M. sinensis</i> 11-1088 (CBS 10357 <sup>T</sup> ) <hr/>    |          |           |
| D1/D2                                                               | amplicon | MZ651987* |
|                                                                     | cloned   | KM275352  |
|                                                                     | cloned   | KM275353  |
|                                                                     | cloned   | KM275354  |
|                                                                     | cloned   | KM275355  |
|                                                                     | cloned   | KM275356  |
|                                                                     | cloned   | KM275357  |
|                                                                     | cloned   | KM275358  |
|                                                                     | cloned   | KM275359  |
|                                                                     | cloned   | KM275360  |
|                                                                     | cloned   | KM275361  |
|                                                                     | cloned   | KM275362  |
|                                                                     | cloned   | KM275363  |
|                                                                     | cloned   | KM275364  |
|                                                                     | cloned   | KM275365  |
| <hr/>                                                               |          |           |
| ITS                                                                 | amplicon | KY104211  |
|                                                                     | amplicon | DQ367881  |
|                                                                     | amplicon | NR_155404 |
|                                                                     | amplicon | MW543446  |
|                                                                     | cloned   | KM243713  |
|                                                                     | cloned   | KM243714  |
|                                                                     | cloned   | KM243715  |
|                                                                     | cloned   | KM243716  |
|                                                                     | cloned   | KM243717  |
|                                                                     | cloned   | KM243718  |
|                                                                     | cloned   | KM243719  |
|                                                                     | cloned   | KM243720  |
|                                                                     | cloned   | KM243721  |
| <hr/> <i>M. ziziphicola</i> 11-1089 (CBS 10358 <sup>T</sup> ) <hr/> |          |           |
| D1/D2                                                               | amplicon | MZ654802* |
|                                                                     | cloned   | KM275366  |
|                                                                     | cloned   | KM275367  |
|                                                                     | cloned   | KM275368  |
|                                                                     | cloned   | KM275369  |
|                                                                     | cloned   | KM275370  |
|                                                                     | cloned   | KM275371  |
|                                                                     | cloned   | KM275372  |
|                                                                     | cloned   | KM275373  |
|                                                                     | cloned   | KM275374  |
| <hr/>                                                               |          |           |
| ITS                                                                 | amplicon | KY104214  |
|                                                                     | amplicon | DQ367882  |
|                                                                     | amplicon | MW543705  |
|                                                                     | amplicon | NR_166218 |
|                                                                     | cloned   | KM243722  |
|                                                                     | cloned   | KM243723  |

|        |          |
|--------|----------|
| cloned | KM243724 |
| cloned | KM243725 |
| cloned | KM243726 |
| cloned | KM243727 |
| cloned | KM243728 |
| cloned | KM243729 |
| cloned | KM243730 |

---

\*: sequenced in this study. T: type strain
