# Supplementary material for: Taxonomic Revision of the pulcherrima Clade of Metschnikowia (Fungi): Merger of Species
Source: MDPI journal article supplement (doi:10.3390/taxonomy2010009), 2022-03-01
Supplement: s1 [file s1]

**Table S1.** List of strains.

| Identification number             |                        | Phenotype<br>(genetic marker)     | Source                |
|-----------------------------------|------------------------|-----------------------------------|-----------------------|
| In-house collection               | CBS                    |                                   |                       |
| <i>Metschnikowia andauensis</i>   |                        |                                   |                       |
| 11-1120                           | CBS 10809 <sup>T</sup> | Wild type                         | CBS                   |
| 11-1596                           | CBS 15376              | ade <sup>-</sup>                  | Sipiczki et al., 2018 |
| 11-1597                           |                        | ade <sup>-</sup>                  | This study            |
| 11-1598                           | CBS 15377              | arg <sup>-</sup>                  | Sipiczki et al., 2018 |
| 11-1599                           |                        | try <sup>-</sup>                  | This study            |
| <i>Metschnikowia fructicola</i>   |                        |                                   |                       |
| 11-579                            | CBS 8853 <sup>T</sup>  | Wild type                         | CBS                   |
| 11-1455                           |                        | lys <sup>-</sup> his <sup>-</sup> | Sipiczki, 2021        |
| 11-1456                           |                        | lys <sup>-</sup> pro <sup>-</sup> | Sipiczki et al., 2018 |
| 11-1457                           |                        | lys <sup>-</sup> arg <sup>-</sup> | Sipiczki, 2021        |
| 11-1458                           |                        | ade <sup>-</sup> his <sup>-</sup> | Sipiczki et al., 2018 |
| 11-1594                           |                        | pro <sup>-</sup>                  | Sipiczki, 2021        |
| 11-1595                           |                        | aux                               | Sipiczki, 2021        |
| <i>Metschnikowia pulcherrima</i>  |                        |                                   |                       |
| 11-578                            | CBS 5833 <sup>T</sup>  | Wild type                         | CBS                   |
| 11-1591                           | CBS 15390              | his <sup>-</sup> α                | Sipiczki et al., 2018 |
| 11-1592                           | CBS 15381              | ade <sup>-</sup> a                | Sipiczki et al., 2018 |
| 11-1593                           |                        | lys <sup>-</sup> α                | Sipiczki et al., 2018 |
| <i>Metschnikowia shanxiensis</i>  |                        |                                   |                       |
| 11-1090                           | CBS 10359 <sup>T</sup> | Wild type                         | CBS                   |
| 11-1605                           |                        | asp <sup>-</sup>                  | Sipiczki, 2021        |
| 11-1620                           |                        | his <sup>-</sup>                  | Sipiczki, 2021        |
| <i>Metschnikowia sinensis</i>     |                        |                                   |                       |
| 11-1088                           | CBS 10357 <sup>T</sup> | Wild type                         | CBS                   |
| 11-1609                           |                        | ade <sup>-</sup>                  | Sipiczki, 2021        |
| 11-1610                           |                        | ade <sup>-</sup>                  | Sipiczki, 2021        |
| 11-1612                           |                        | ade <sup>-</sup>                  | Sipiczki, 2021        |
| <i>Metschnikowia ziziphicola</i>  |                        |                                   |                       |
| 11-1089                           | CBS 10358 <sup>T</sup> | Wild type                         | CBS                   |
| 11-1604                           |                        | asp <sup>-</sup>                  | Sipiczki, 2021        |
| 11-1621                           |                        | lys <sup>-</sup>                  | Sipiczki, 2021        |
| 11-1622                           |                        | ade <sup>-</sup>                  | Sipiczki, 2021        |
| <i>Metschnikowia chrysoperlae</i> |                        |                                   |                       |
| 11-1158                           | CBS 9803 <sup>T</sup>  | Wild type                         | CBS                   |

<sup>T</sup>: Type material. CBS: CBS-KNAW Culture Collections (Utrecht, Netherlands). All mutants were obtained by mutagenesis of type strains.
