# Supplementary material for: Taxonomic Revision of the pulcherrima Clade of Metschnikowia (Fungi): Merger of Species
Source: MDPI journal article supplement (doi:10.3390/taxonomy2010009), 2022-03-01
Supplement: s1 [file s1]

**Table S3.** Accession numbers of secondary barcode sequences

| Strain                                                                          | Subject of sequencing                                        | Accession numbers of barcode and genome sequences     |                                                                                               |                                                       |                                      |
|---------------------------------------------------------------------------------|--------------------------------------------------------------|-------------------------------------------------------|-----------------------------------------------------------------------------------------------|-------------------------------------------------------|--------------------------------------|
|                                                                                 |                                                              | <i>ACT1</i>                                           | <i>TEF1</i>                                                                                   | RPB2                                                  |                                      |
| Type strains                                                                    |                                                              |                                                       |                                                                                               |                                                       |                                      |
| <i>M. andauensis</i> CBS 10809 <sup>T</sup><br>(NRRL Y-48695, HA 1657, 11-1120) | Amplicon                                                     | AJ745122                                              | MG050911                                                                                      | KC859678                                              |                                      |
|                                                                                 |                                                              | KC859880                                              |                                                                                               | MZ889651(1120A)                                       |                                      |
|                                                                                 | Cloned DNA                                                   |                                                       | MG595725                                                                                      |                                                       |                                      |
| <i>M. citriensis</i> (nom. invalid) FL01 <sup>T</sup>                           | Amplicon                                                     |                                                       |                                                                                               | MZ889652                                              |                                      |
|                                                                                 | from mutant                                                  |                                                       |                                                                                               | MZ889653                                              |                                      |
|                                                                                 | Genome                                                       | ASM974605v1<br>(complete: contig 10)                  | ASM974605v1<br>(complete: contigs 5, 6, 8)                                                    | ASM974605v1<br>(complete: contigs 9, 10)              |                                      |
| <i>M. fructicola</i> CBS 8853 <sup>T</sup><br>(NRRL Y-27328, 11-579)            | Amplicon                                                     | AJ745127                                              | MG050908                                                                                      | KC859693                                              |                                      |
|                                                                                 |                                                              | KC859895                                              |                                                                                               | MZ889650 (579A)                                       |                                      |
|                                                                                 | Cloned DNA                                                   |                                                       | MG595726                                                                                      | MW799695                                              |                                      |
|                                                                                 |                                                              |                                                       |                                                                                               | MW799690                                              |                                      |
|                                                                                 |                                                              |                                                       |                                                                                               | MW799689                                              |                                      |
|                                                                                 |                                                              |                                                       |                                                                                               | MW799687                                              |                                      |
|                                                                                 |                                                              |                                                       |                                                                                               | MW799691                                              |                                      |
|                                                                                 |                                                              |                                                       |                                                                                               | MW799694                                              |                                      |
|                                                                                 |                                                              |                                                       |                                                                                               | MW799688                                              |                                      |
|                                                                                 |                                                              |                                                       |                                                                                               | MW799693                                              |                                      |
|                                                                                 |                                                              |                                                       |                                                                                               | MW799692                                              |                                      |
|                                                                                 | Genome                                                       | <a href="#">ASM31735v2</a><br>(complete: unitig183)   | <a href="#">ASM31735v2</a><br>(complete: unitigs 41, 50, 124, 212, 213; fraction: unitig 43)  | <a href="#">ASM31735v2</a><br>(complete: unitig 185)  |                                      |
|                                                                                 | <i>M. leonuri</i> NRRL Y-6546 <sup>T</sup>                   | Amplicon                                              |                                                                                               | MG050914                                              | MG050965                             |
|                                                                                 |                                                              | <i>M. persimmonesis</i> KIOM G15050 <sup>T</sup>      | Genome                                                                                        | ASM1490579v1<br>(complete: contig 2)                  | ASM1490579v1<br>(complete: contig 8) |
|                                                                                 | <i>M. pulcherrima</i> CBS 5833 <sup>T</sup><br>(NRRL Y-7111) |                                                       | Amplicon                                                                                      | AJ745126                                              | MG050910                             |
|                                                                                 |                                                              | KC859911                                              |                                                                                               |                                                       |                                      |
| <i>M. rubicola</i> NRRL Y-6064 <sup>T</sup>                                     | Amplicon                                                     |                                                       | MG050916                                                                                      | MG050966                                              |                                      |
| <i>M. shanxiensis</i> CBS 10359 <sup>T</sup><br>(NRRL Y-48710)                  | Amplicon                                                     | KC859914                                              | MG050912                                                                                      | KC859710                                              |                                      |
|                                                                                 |                                                              | MW847421                                              |                                                                                               | MG050972                                              |                                      |
| <i>M. sinensis</i> CBS 10357 <sup>T</sup>                                       | Amplicon                                                     | KC859917                                              |                                                                                               | KC859713                                              |                                      |
|                                                                                 |                                                              | MW847420                                              |                                                                                               |                                                       |                                      |
| <i>M. zyziphicola</i> CBS 10358 <sup>T</sup><br>(NRRL Y-48712)                  | Amplicon                                                     | KC859920                                              | MG050909                                                                                      | KC859716                                              |                                      |
|                                                                                 |                                                              | MW847422                                              |                                                                                               |                                                       |                                      |
| Strains of uncertain taxonomic position                                         |                                                              |                                                       |                                                                                               |                                                       |                                      |
| AF47                                                                            | Genome                                                       | <a href="#">ASM301728v1</a><br>(complete: unitig 183) | <a href="#">ASM301728v1</a><br>(complete: unitigs 41, 50, 124, 212, 213; fraction: unitig 43) | <a href="#">ASM301728v1</a><br>(complete: unitig 185) |                                      |

|                                |                  |                                                    |                                                               |                                                                |
|--------------------------------|------------------|----------------------------------------------------|---------------------------------------------------------------|----------------------------------------------------------------|
| APC 1.2                        | Genome           | <a href="#">ASM421770v1</a><br>(complete: Chr. IV) | <a href="#">ASM421770v1</a><br>(complete: Chr. V, Chr. VI)    | <a href="#">ASM421770v1</a><br>(complete: Chr. IV)             |
| Bath1                          | Genome           | ASM993245v1<br>(complete: scaffold 15)             | ASM993245v1<br>(complete: scaffold 8; fraction: scaffold 137) | ASM993245v1<br>(complete: scaffold 326; fraction: scaffold 43) |
| <b>CBS 610</b>                 | Amplicon         | AJ389071                                           |                                                               |                                                                |
| CBS 2255                       | Amplicon         | AJ389070                                           |                                                               |                                                                |
| CBS 8174                       | Amplicon         | KC859866                                           |                                                               |                                                                |
| HA 1622                        | Amplicon         | AJ745125                                           |                                                               |                                                                |
| HA 1657                        | Amplicon         | AJ745122                                           |                                                               |                                                                |
| HA 1627                        | Amplicon         | AJ745118                                           |                                                               |                                                                |
| HA 1631                        | Amplicon         | AJ745123                                           |                                                               |                                                                |
| HA 1634                        | Amplicon         | AJ745119                                           |                                                               |                                                                |
| HA 1647                        | Amplicon         | AJ745121                                           |                                                               |                                                                |
| HA 1648                        | Amplicon         | AJ745124                                           |                                                               |                                                                |
| HA 1652                        | Amplicon         | AJ745116                                           |                                                               |                                                                |
| HA 1653                        | Amplicon         | AJ745117                                           |                                                               |                                                                |
| NRRL Y-6464                    | Amplicon         |                                                    | MG050915                                                      |                                                                |
| UCD 127                        | Genome           | <a href="#">ASM312363v1</a><br>(complete: node 8)  | <a href="#">ASM312363v1</a><br>(fraction: nodes 547, 1051)    | <a href="#">ASM312363v1</a><br>(fraction: node 274)            |
| <b>Outgroup species</b>        |                  |                                                    |                                                               |                                                                |
| <i>M. bicuspidata</i> CBS 5575 | Amplicon /Genome | XM_018855158                                       | XM_018857475                                                  | KC859681                                                       |

<sup>T</sup>: Type material.
